# Supplementary material
Source: PubMed Central journal article supplement (PMC7901669)

## Supplementary Material\*

Anesi GL, Jablonski J, Harhay MO, et al. Characteristics, Outcomes, and Trends of Patients With COVID-19–Related Critical Illness at a Learning Health System in the United States. *Ann Intern Med*. 19 January 2021 [Epub ahead of print]. doi:10.7326/M20-5327

*Supplement. Supplement Tables and Figures*

\* This supplementary material was provided by the authors to give readers further details on their article. The material was reviewed but not copyedited.

## **SUPPLEMENTAL TABLES**

eTable 1. Characteristics of COVID-19 patients with critical illness by period

eTable 2. Acute physiology of patients with COVID-19 critical illness at ICU admission by period

eTable 3. Mechanical ventilation over time

eTable 4. All-cause 28-day in-hospital mortality over time

eTable 5. All-cause 28-day in-hospital mortality among patients requiring mechanical ventilation over time

eTable 6. All-cause 28-day in-hospital mortality over time adjusted for COVID-19 patient occupancy of pre-COVID-19 ICU and ward bed capacity

eTable 7. All-cause death at any time over time

eTable 8. All-cause 28-day in-hospital mortality over time among patients less than or equal to 50 years of age

## **SUPPLEMENTAL FIGURES**

eFigure 1. Penn Medicine Critical Care Alliance COVID-19 Task Force Timeline

eFigure 2. Charlson Comorbidity Index diagnosis proportions

eFigure 3. Mechanical ventilation over time

eFigure 4. All-cause 28-day in-hospital mortality among patients requiring mechanical ventilation over time

eFigure 5. COVID-19 patient occupancy of pre-COVID-19 ICU and ward bed capacity

eFigure 6. All-cause 28-day in-hospital mortality over time adjusted for COVID-19 patient occupancy of pre-COVID-19 ICU and ward bed capacity

eFigure 7. All-cause death at any time over time

eFigure 8. All-cause 28-day in-hospital mortality over cumulative COVID-19 patient volume

eFigure 9. All-cause 28-day in-hospital mortality over time among patients less than or equal to 50 years of age

eFigure 10. Age and in-hospital mortality

Supplement to: Anesi GL, et al. Characteristics, outcomes, and trends of patients with COVID-19–related critical illness at a learning health system in the U.S.

## TABLES

**eTable 1. Characteristics of COVID-19 patients with critical illness by period**

| Characteristics                                                            | Period         |                |              |                |
|----------------------------------------------------------------------------|----------------|----------------|--------------|----------------|
|                                                                            | 3/13-3/27      | 3/28-4/11      | 4/12-4/26    | 4/27-5/11      |
| Patients, n                                                                | 63             | 165            | 140          | 96             |
| Age, median years (IQR)                                                    | 63 (53-75)     | 66 (59-74)     | 65 (54-73)   | 64 (48-78)     |
| Female sex, n (%)                                                          | 24 (38.1)      | 70 (42.4)      | 60 (42.9)    | 42 (43.8)      |
| Race, n (%)                                                                |                |                |              |                |
| Black                                                                      | 24 (38.1)      | 90 (54.6)      | 79 (56.4)    | 52 (54.2)      |
| White                                                                      | 20 (31.8)      | 45 (27.3)      | 29 (20.7)    | 20 (20.8)      |
| Other <sup>a</sup>                                                         | 19 (30.2)      | 30 (18.2)      | 32 (22.9)    | 24 (25.0)      |
| Hispanic ethnicity, n (%)                                                  | 5 (7.9)        | 15 (9.1)       | 13 (9.3)     | 10 (10.4)      |
| Hospital admission source, n (%)                                           |                |                |              |                |
| Emergency department                                                       | 57 (90.5)      | 152 (92.1)     | 123 (87.9)   | 86 (89.6)      |
| Other institution                                                          | 5 (7.9)        | 9 (5.5)        | 16 (11.4)    | 8 (8.3)        |
| Outpatient clinic                                                          | 1 (1.6)        | 3 (1.8)        | 1 (0.7)      | 2 (2.1)        |
| Insurance, n (%)                                                           |                |                |              |                |
| Private                                                                    | 28 (44.4)      | 57 (34.6)      | 49 (35.0)    | 25 (26.0)      |
| Medicare                                                                   | 30 (47.6)      | 85 (51.5)      | 67 (47.9)    | 41 (42.7)      |
| Medicaid or no insurance <sup>b</sup>                                      | 3 (4.8)        | 11 (6.7)       | 15 (10.7)    | 18 (18.8)      |
| Missing                                                                    | 2 (3.2)        | 12 (7.3)       | 9 (6.4)      | 12 (12.5)      |
| Body mass index at admission, n (%)                                        |                |                |              |                |
| < 18.5                                                                     | 2 (3.2)        | 3 (1.8)        | 2 (1.4)      | 3 (3.1)        |
| 18.5-34.9                                                                  | 45 (71.4)      | 121 (73.3)     | 101 (72.1)   | 64 (66.7)      |
| ≥ 35                                                                       | 15 (23.8)      | 35 (21.2)      | 34 (24.3)    | 25 (26.0)      |
| Missing                                                                    | 1 (1.6)        | 6 (3.6)        | 3 (2.1)      | 4 (4.2)        |
| Pregnancy, n (%)                                                           | 1 (1.6)        | 3 (1.8)        | 1 (0.7)      | 2 (2.1)        |
| Charlson Comorbidity Index, n (%) unless otherwise noted                   |                |                |              |                |
| Median (IQR)                                                               | 3 (0-5)        | 3 (1-5)        | 3 (1-6)      | 3 (2-6)        |
| Points = 0                                                                 | 18 (28.6)      | 26 (15.8)      | 27 (19.3)    | 10 (10.4)      |
| Points = 1                                                                 | 4 (6.4)        | 24 (14.6)      | 10 (7.1)     | 13 (13.5)      |
| Points ≥ 2                                                                 | 41 (65.1)      | 115 (69.7)     | 103 (73.6)   | 73 (76.0)      |
| Duration from acute care presentation to ICU admission, median hours (IQR) | 2.6 (0.6-47.7) | 2.6 (0.6-41.0) | 2.2 (0-48.7) | 1.6 (0.5-19.0) |

Supplement to: Anesi GL, et al. Characteristics, outcomes, and trends of patients with COVID-19–related critical illness at a learning health system in the U.S.

---

*Notes: <sup>a</sup> Other race includes Hispanic/Latino Black, Hispanic/Latino White, Asian, East Indian, Pacific Island, other, and unknown. <sup>b</sup> The no insurance population includes patients confirmed to have no insurance and require safety net support, as distinct from missing insurance status. ICU, intensive care unit; IQR, interquartile range.*

**eTable 2. Acute physiology of patients with COVID-19 critical illness at ICU admission by period**

| Acute physiology assessments                                                      | Period                                  |                                          |                                          |                                          |
|-----------------------------------------------------------------------------------|-----------------------------------------|------------------------------------------|------------------------------------------|------------------------------------------|
|                                                                                   | 3/13-3/27                               | 3/28-4/11                                | 4/12-4/26                                | 4/27-5/11                                |
| Patients, n                                                                       | 63                                      | 165                                      | 140                                      | 96                                       |
| <b>Composite acuity measures</b>                                                  |                                         |                                          |                                          |                                          |
| p <sub>A</sub> O <sub>2</sub> : FIO <sub>2</sub> ratio, median (IQR) <sup>a</sup> | 103 (66-212)                            | 110 (66-204)                             | 100 (65-160)                             | 94 (59-175)                              |
| p <sub>A</sub> O <sub>2</sub> : FIO <sub>2</sub> ratio ≤ 300, n (%) <sup>a</sup>  | 40 (63.5)                               | 107 (64.9)                               | 76 (54.3)                                | 56 (47.9)                                |
| SOFA score, median (IQR) <sup>b</sup>                                             | 5 (3-6)                                 | 5 (3-7)                                  | 4 (2.5-6.5)                              | 4.5 (1-7)                                |
| Respiratory SOFA sub-score, median (IQR)                                          | 2 (0-4)                                 | 3 (0-4)                                  | 2 (0.4)                                  | 0 (0-3)                                  |
| <b>Vital signs</b>                                                                |                                         |                                          |                                          |                                          |
| Maximum Glasgow Coma Score < 15, n (%)                                            | 15 (32.6)                               | 51 (32.9)                                | 38 (31.7)                                | 35 (38.5)                                |
| Temperature ≥ 38.0 °C, n (%)                                                      | 43 (68.3)                               | 99 (60.0)                                | 76 (54.3)                                | 45 (46.9)                                |
| Maximum heart rate, median beats per minute (IQR)                                 | 105 (93-124)                            | 115 (99-127)                             | 111 (97-129)                             | 113 (98-129)                             |
| Minimum systolic blood pressure, median mmHg (IQR)                                | 87 (81-101)                             | 87 (77-98)                               | 92 (82-106)                              | 96 (83-110)                              |
| Minimum mean arterial pressure, median mmHg (IQR)                                 | 64 (59-74)                              | 64 (55-71)                               | 67 (60-76)                               | 69 (59-79)                               |
| Maximum respiratory rate, median breaths per minute (IQR)                         | 36 (30-40)                              | 35 (30-42)                               | 35 (29-42)                               | 35 (28-42)                               |
| Minimum oxygen saturation, median SpO <sub>2</sub> , % (IQR)                      | 85 (77-90)                              | 86 (77-90)                               | 87 (81-091)                              | 87 (78-92)                               |
| FIO <sub>2</sub> at ICU admission, median % (IQR)                                 | 91 (56-100)                             | 91 (60-100)                              | 60 (50-100)                              | 60 (42-100)                              |
| <b>Arterial blood gas measurements</b>                                            |                                         |                                          |                                          |                                          |
| Minimum pH, median (IQR)                                                          | 7.30 (7.21-7.39)                        | 7.28 (7.22-7.37)                         | 7.33 (7.24-7.40)                         | 7.36 (7.27-7.42)                         |
| Minimum p <sub>A</sub> O <sub>2</sub> , median mmHg (IQR)                         | 65 (51-93)                              | 60 (41-85)                               | 59 (41-80)                               | 54 (42-72)                               |
| Maximum P <sub>A</sub> CO <sub>2</sub> , median mmHg (IQR)                        | 56 (43-62)                              | 50 (40-61)                               | 45 (38-54)                               | 46 (38-53)                               |
| Maximum lactate, median mmol/L (IQR)                                              | 1.8 (1.3-2.8)                           | 1.9 (1.3-3.3)                            | 2.1 (1.4-3.1)                            | 2.0 (1.3-3.2)                            |
| <b>Blood counts</b>                                                               |                                         |                                          |                                          |                                          |
| White blood cell count, maximum, n (%)                                            |                                         |                                          |                                          |                                          |
| < 4 × 10 <sup>9</sup> /L                                                          | 7 (11.1)                                | 1 (0.6)                                  | 6 (4.3)                                  | 3 (3.1)                                  |
| 4-12 × 10 <sup>9</sup> /L                                                         | 36 (57.1)                               | 118 (71.5)                               | 75 (53.6)                                | 65 (67.7)                                |
| > 12 × 10 <sup>9</sup> /L                                                         | 19 (30.2)                               | 45 (27.3)                                | 54 (38.6)                                | 28 (29.2)                                |
| Minimum absolute lymphocyte count, median cells/L (IQR)                           | 635 (380-830)                           | 700 (400-1000)                           | 600 (400-900)                            | 585 (275-1000)                           |
| Minimum hemoglobin, median mmol/L (IQR)                                           | 7.1 (6.3-7.9)                           | 7.0 (6.0-7.9)                            | 7.3 (5.8-8.1)                            | 7.0 (5.4-8.2)                            |
| Minimum platelet count, median × 10 <sup>9</sup> /L (IQR)                         | 175 (129-223)                           | 196 (147-260)                            | 203 (149-276)                            | 204 (144-271)                            |
| <b>Chemistries</b>                                                                |                                         |                                          |                                          |                                          |
| Minimum sodium, median mmol/L (IQR)                                               | 135 (133-139)                           | 135 (132-139)                            | 135 (132-140)                            | 136 (132-139)                            |
| Maximum potassium, median mmol/L (IQR)                                            | 4.4 (4.0-4.8)                           | 4.5 (4.1-5.0)                            | 4.6 (4.2-5.3)                            | 4.4 (4.1-4.9)                            |
| Maximum blood urea nitrogen (BUN), median mmol/L (IQR)                            | 7.1 (5.0-12.1)                          | 8.9 (6.4-16.4)                           | 10.7 (6.1-17.1)                          | 8.9 (5.7-15.4)                           |
| Maximum creatinine, median μmol/L (IQR) [mg/dL (IQR)]                             | 98.2 (70.7-153.0)<br>[1.11 (0.80-1.73)] | 117.6 (79.6-213.1)<br>[1.33 (0.90-2.41)] | 111.4 (83.1-210.4)<br>[1.26 (0.94-2.38)] | 104.3 (70.7-194.5)<br>[1.18 (0.80-2.20)] |
| Minimum bicarbonate, median mmol/L (IQR)                                          | 22 (19-24)                              | 21 (18-24)                               | 21 (19-24)                               | 23 (20-25)                               |
| Minimum glucose, median mmol/L (IQR) [mg/dL (IQR)]                                | 6.0 (5.2-7.2)<br>[108 (93-129)]         | 6.1 (5.1-7.2)<br>[109 (92-129)]          | 6.0 (5.2-7.6)<br>[108 (93-136)]          | 5.7 (4.6-7.2)<br>[102 (83-130)]          |
| Maximum anion gap, median mmol/L (IQR)                                            | 15 (10-18)                              | 13 (11-17)                               | 13 (11-17)                               | 13 (11-16)                               |
| <b>Liver function tests</b>                                                       |                                         |                                          |                                          |                                          |
| Minimum albumin, median g/L (IQR)                                                 | 30 (28-34)                              | 30 (27-32)                               | 31 (27-34)                               | 30 (26-33)                               |
| Maximum aspartate aminotransferase (AST), median units/L (IQR)                    | 44 (31-84)                              | 48 (31-73)                               | 43 (29-70)                               | 38 (27-60)                               |
| Maximum alanine aminotransferase (ALT), median units/L (IQR)                      | 27 (19-61)                              | 31 (18-49)                               | 29 (18-55)                               | 26 (17-46)                               |
| Maximum total bilirubin, median μmol/L (IQR) [mg/dL (IQR)]                        | 10.3 (6.8-13.7)<br>[0.6 (0.4-0.8)]      | 12.0 (6.8-17.1)<br>[0.7 (0.4-1.0)]       | 10.3 (6.8-13.7)<br>[0.6 (0.4-0.8)]       | 10.3 (6.8-15.4)<br>[0.6 (0.4-0.9)]       |
| <b>Coagulation parameters</b>                                                     |                                         |                                          |                                          |                                          |
| Maximum international normalized ratio (INR), median (IQR)                        | 1.2 (1.2-1.5)                           | 1.2 (1.2-1.5)                            | 1.3 (1.1-1.4)                            | 1.3 (1.2-1.4)                            |
| Maximum partial thromboplastin time (PTT), median seconds (IQR)                   | 32.4 (30.4-37.3)                        | 32.9 (29.8-37.9)                         | 34.4 (30.2-42.2)                         | 33.8 (29.7-51.6)                         |
| Maximum D-dimer, median nmol/L (IQR)                                              | 6.24 (3.23-11.44)                       | 7.94 (5.15-25.68)                        | 9.42 (3.72-26.12)                        | 9.31 (4.82-25.08)                        |
| Maximum fibrinogen, median g/L (IQR)                                              | 6.1 (4.7-6.5)                           | 5.4 (4.2-6.9)                            | 6.8 (5.3-7.7)                            | 4.4 (3.5-5.9)                            |
| <b>Inflammation and injury markers</b>                                            |                                         |                                          |                                          |                                          |
| Maximum procalcitonin, median ng/mL (IQR)                                         | 0.24 (0.15-1.64)                        | 0.40 (0.20-0.90)                         | 0.48 (0.18-2.13)                         | 0.35 (0.17-1.26)                         |
| Maximum C-reactive protein, median mg/L (IQR)                                     | 51.9 (25.4-98.7)                        | 104.4 (51.4-142.6)                       | 108.1 (82.1-134.6)                       | 97.1 (27.2-125.8)                        |
| Maximum ferritin, median μg/L (IQR)                                               | 1403 (482-2742)                         | 945 (448-1978)                           | 654 (293-1775)                           | 668 (367-1409)                           |
| Maximum troponin-T, median μg/L (IQR)                                             | 0.03 (0.02-0.29)                        | 0.05 (0.02-0.19)                         | 0.08 (0.02-0.19)                         | 0.90 (0.03-0.45)                         |
| Maximum lactate dehydrogenase (LDH), median μkat/L (IQR)                          | 8.9 (7.4-12.0)                          | 7.3 (5.5-9.5)                            | 6.2 (5.1-9.3)                            | 6.6 (4.8-9.1)                            |
| Maximum interleukin 6 (IL-6), median pg/mL (IQR)                                  | 15 (7-33)                               | 40 (10-159)                              | 11 (7-15)                                | 21 (11-265)                              |

Notes: Descriptive statistics calculated among non-missing data prior to imputation. Minimum and maximum refer to the most extreme measurements in the 24 hours prior to and after ICU admission. <sup>a</sup> p<sub>A</sub>O<sub>2</sub> : FIO<sub>2</sub> ratio calculated based on the P<sub>A</sub>O<sub>2</sub> and FIO<sub>2</sub> measurements closest to ICU admission among the full study cohort. <sup>b</sup> SOFA score calculated using worst measurements in the 24 hours prior to and after ICU admission, a conversion of supplemental oxygen in liters per minute to FIO<sub>2</sub>, creatinine alone for renal function, binary vasopressor assessment, and assuming 0 for missing sub-scores. ICU, intensive care unit; IQR, interquartile range; SOFA, Sequential Organ Failure Assessment.

**eTable 3. Mechanical ventilation over time**

| <b>Model</b>                                                 | <b>Period</b> | <b>OR (95% CI, p-value)</b> | <b>Mechanical ventilation % (95% CI)</b> |
|--------------------------------------------------------------|---------------|-----------------------------|------------------------------------------|
| Unadjusted                                                   | 3/13-3/27     | Reference                   | 85.7 (77.1-94.4)                         |
|                                                              | 3/28-4/11     | 0.49 (0.22-1.07, 0.074)     | 74.5 (67.9-81.2)                         |
|                                                              | 4/12-4/26     | 0.29 (0.13-0.64, 0.002)*    | 63.6 (55.6-71.5)                         |
|                                                              | 4/27-5/11     | 0.20 (0.09-0.44, <0.001)*   | 54.2 (44.2-64.1)                         |
| Adjusted for P <sub>A</sub> O <sub>2</sub> :FiO <sub>2</sub> | 3/13-3/27     | Reference                   | 95.6 (89.7-101.6)                        |
|                                                              | 3/28-4/11     | 0.52 (0.11-2.45, 0.41)      | 91.9 (87.0-96.7)                         |
|                                                              | 4/12-4/26     | 0.22 (0.05-1.01, 0.052)*    | 82.8 (74.-90.7)                          |
|                                                              | 4/27-5/11     | 0.14 (0.03-0.66, 0.013)*    | 75.5 (64.0-87.1)                         |

Notes: \*  $p < 0.05$ . CI, confidence interval; OR, odds ratio.

**eTable 4. All-cause 28-day in-hospital mortality over time**

| Model                          | Period    | OR (95% CI, p-value)      | Mortality % (95% CI) |
|--------------------------------|-----------|---------------------------|----------------------|
| Unadjusted                     | 3/13-3/27 | Reference                 | 46.0 (33.7-58.3)     |
|                                | 3/28-4/11 | 0.64 (0.35-1.15, 0.132)   | 35.2 (27.9-42.4)     |
|                                | 4/12-4/26 | 0.41 (0.22-0.76, 0.005)*  | 25.7 (18.5-33.0)     |
|                                | 4/27-5/11 | 0.25 (0.12-0.52, <0.001)* | 17.7 (10.1-24.3)     |
| Core Adjusted <sup>a</sup>     | 3/13-3/27 | Reference                 | 43.5 (31.3-53.8)     |
|                                | 3/28-4/11 | 0.57 (0.28-1.15, 0.119)   | 32.2 (26.0-38.6)     |
|                                | 4/12-4/26 | 0.47 (0.23-0.97, 0.042)*  | 28.9 (21.9-35.8)     |
|                                | 4/27-5/11 | 0.24 (0.10-0.57, 0.001)*  | 19.2 (11.6-26.7)     |
| Expanded Adjusted <sup>b</sup> | 3/13-3/27 | Reference                 | 45.3 (28.9-61.7)     |
|                                | 3/28-4/11 | 0.66 (0.24-1.80, 0.42)    | 37.9 (29.9-45.8)     |
|                                | 4/12-4/26 | 0.60 (0.21-1.77, 0.36)    | 36.3 (26.6-45.9)     |
|                                | 4/27-5/11 | 0.29 (0.09-0.99, 0.047)*  | 24.7 (13.3-36.1)     |

Notes: \*  $p < 0.05$ . <sup>a</sup> Adjusted for age, Charlson Comorbidity Index, SOFA score, and hospital. <sup>b</sup> Additionally adjusted for body mass index, Glasgow Coma Score, oxygen saturation, respiratory rate, platelet count, and  $P_{aO_2}:FiO_2$  ratio. CI, confidence interval; OR, odds ratio; SOFA, Sequential Organ Failure Assessment.



**eTable 5. All-cause 28-day in-hospital mortality among patients requiring mechanical ventilation over time**

| Model                          | Period    | OR (95% CI, p-value)     | Mortality % (95% CI) |
|--------------------------------|-----------|--------------------------|----------------------|
| Unadjusted                     | 3/13-3/27 | Reference                | 52.9 (38.5-65.2)     |
|                                | 3/28-4/11 | 0.61 (0.32-1.17, 0.139)  | 39.8 (31.2-48.5)     |
|                                | 4/12-4/26 | 0.43 (0.21-0.86, 0.016)* | 31.5 (21.8-41.1)     |
|                                | 4/27-5/11 | 0.31 (0.14-0.71, 0.005)* | 25.0 (13.2-36.8)     |
| Core Adjusted <sup>a</sup>     | 3/13-3/27 | Reference                | 43.5 (31.3-53.8)     |
|                                | 3/28-4/11 | 0.53 (0.25-1.12, 0.096)  | 32.2 (26.0-38.6)     |
|                                | 4/12-4/26 | 0.47 (0.21-1.03, 0.060)  | 28.9 (21.9-35.8)     |
|                                | 4/27-5/11 | 0.29 (0.11-0.76, 0.012)* | 19.2 (11.6-26.7)     |
| Expanded Adjusted <sup>b</sup> | 3/13-3/27 | Reference                | 46.5 (29.6-63.4)     |
|                                | 3/28-4/11 | 0.64 (0.23-1.76, 0.38)   | 38.2 (29.8-46.6)     |
|                                | 4/12-4/26 | 0.59 (0.19-1.79, 0.35)   | 36.8 (25.9-47.8)     |
|                                | 4/27-5/11 | 0.21 (0.05-0.78, 0.021)* | 20.5 (8.2-32.8)      |

Notes: \*  $p < 0.05$ . <sup>a</sup> Adjusted for age, Charlson Comorbidity Index, SOFA score, and hospital. <sup>b</sup> Additionally adjusted for body mass index, Glasgow Coma Score, oxygen saturation, respiratory rate, platelet count, and  $P_{AO_2}:FiO_2$  ratio. CI, confidence interval; OR, odds ratio; SOFA, Sequential Organ Failure Assessment.

**eTable 6. All-cause 28-day in-hospital mortality over time adjusted for COVID-19 patient occupancy of pre-COVID-19 ICU and ward bed capacity**

| Model                      | Period    | OR (95% CI, p-value)      | Mortality % (95% CI) |
|----------------------------|-----------|---------------------------|----------------------|
| Core Adjusted <sup>a</sup> | 3/13-3/27 | Reference                 | 50.2 (38.1-62.4)     |
|                            | 3/28-4/11 | 0.38 (0.19-0.78, 0.008)*  | 31.5 (25.0-38.0)     |
|                            | 4/12-4/26 | 0.29 (0.13-0.66, 0.003)*  | 27.0 (20.0-34.3)     |
|                            | 4/27-5/11 | 0.17 (0.07-0.40, <0.001)* | 18.6 (11.1-26.2)     |

Notes: \*  $p < 0.05$ . <sup>a</sup> Adjusted for age, Charlson Comorbidity Index, SOFA score, and COVID-19 patient occupancy of pre-COVID-19 ICU and ward bed capacity. CI, confidence interval; OR, odds ratio; SOFA, Sequential Organ Failure Assessment.

**eTable 7. All-cause death at any time over time**

| Model                          | Period    | OR (95% CI, p-value)     | Mortality % (95% CI) |
|--------------------------------|-----------|--------------------------|----------------------|
| Unadjusted                     | 3/13-3/27 | Reference                | 47.6 (35.3-60.0)     |
|                                | 3/28-4/11 | 0.77 (0.43-1.38, 0.38)   | 41.2 (33.7-48.7)     |
|                                | 4/12-4/26 | 0.63 (0.35-1.15, 0.133)  | 35.4 (28.5-44.4)     |
|                                | 4/27-5/11 | 0.41 (0.21-0.80, 0.009)* | 27.1 (18.2-36.0)     |
| Core Adjusted <sup>a</sup>     | 3/13-3/27 | Reference                | 44.2 (33.2-55.3)     |
|                                | 3/28-4/11 | 0.73 (0.36-1.49, 0.39)   | 38.6 (32.2-45.0)     |
|                                | 4/12-4/26 | 0.75 (0.36-1.56, 0.44)   | 39.1 (32.0-46.1)     |
|                                | 4/27-5/11 | 0.42 (0.18-0.94, 0.036*) | 29.0 (20.6-37.5)     |
| Expanded Adjusted <sup>b</sup> | 3/13-3/27 | Reference                | 51.1 (34.6-67.6)     |
|                                | 3/28-4/11 | 0.61 (0.21-1.73, 0.35)   | 42.3 (34.5-50.1)     |
|                                | 4/12-4/26 | 0.66 (0.22-2.02, 0.47)   | 43.9 (34.3-53.4)     |
|                                | 4/27-5/11 | 0.40 (0.12-1.34, 0.137)  | 35.1 (22.6-47.5)     |

Notes: \*  $p < 0.05$ . <sup>a</sup> Adjusted for age, Charlson Comorbidity Index, SOFA score, and hospital. <sup>b</sup> Additionally adjusted for body mass index, Glasgow Coma Score, oxygen saturation, respiratory rate, platelet count, and  $P_{aO_2}:FiO_2$  ratio. CI, confidence interval; OR, odds ratio; SOFA, Sequential Organ Failure Assessment.

**eTable 8. All-cause 28-day in-hospital mortality over time among patients less than or equal to 50 years of age**

| Model                      | Period    | OR (95% CI, p-value)     | Mortality % (95% CI) |
|----------------------------|-----------|--------------------------|----------------------|
| Core Adjusted <sup>a</sup> | 3/13-3/27 | Reference                | 21.7 (2.2-41.3)      |
|                            | 3/28-4/11 | 1.93 (0.24-15.70, 0.54)  | 29.7 (15.5-43.9)     |
|                            | 4/12-4/26 | 0.07 (0.003-1.35, 0.078) | 4.4. (-1.7-10.6)     |
|                            | 4/27-5/11 | 0.06 (0.002-2.18, 0.127) | 4.4. (-2.6-11.4)     |

Notes: \*  $p < 0.05$ . <sup>a</sup> Adjusted for age, Charlson Comorbidity Index, SOFA score, and COVID-19 patient occupancy of pre-COVID-19 ICU and ward bed capacity. CI, confidence interval; OR, odds ratio; SOFA, Sequential Organ Failure Assessment.

## FIGURES

**eFigure 1. Penn Medicine Critical Care Alliance COVID-19 Task Force Timeline**

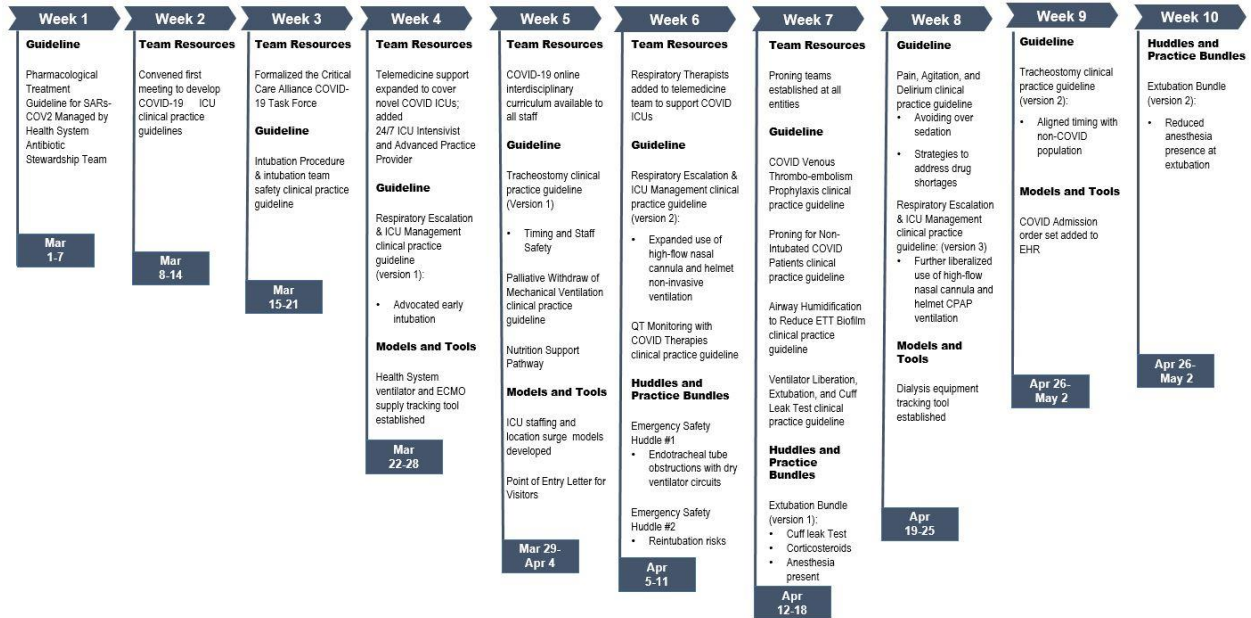

**eFigure 2. Charlson Comorbidity Index diagnosis proportions**

Notes: AIDS, acquired immunodeficiency syndrome; CHF, congestive heart failure; COPD, chronic obstructive pulmonary disease; CVD, cerebrovascular disease; MI, myocardial infarction; PVD, peripheral vascular disease.

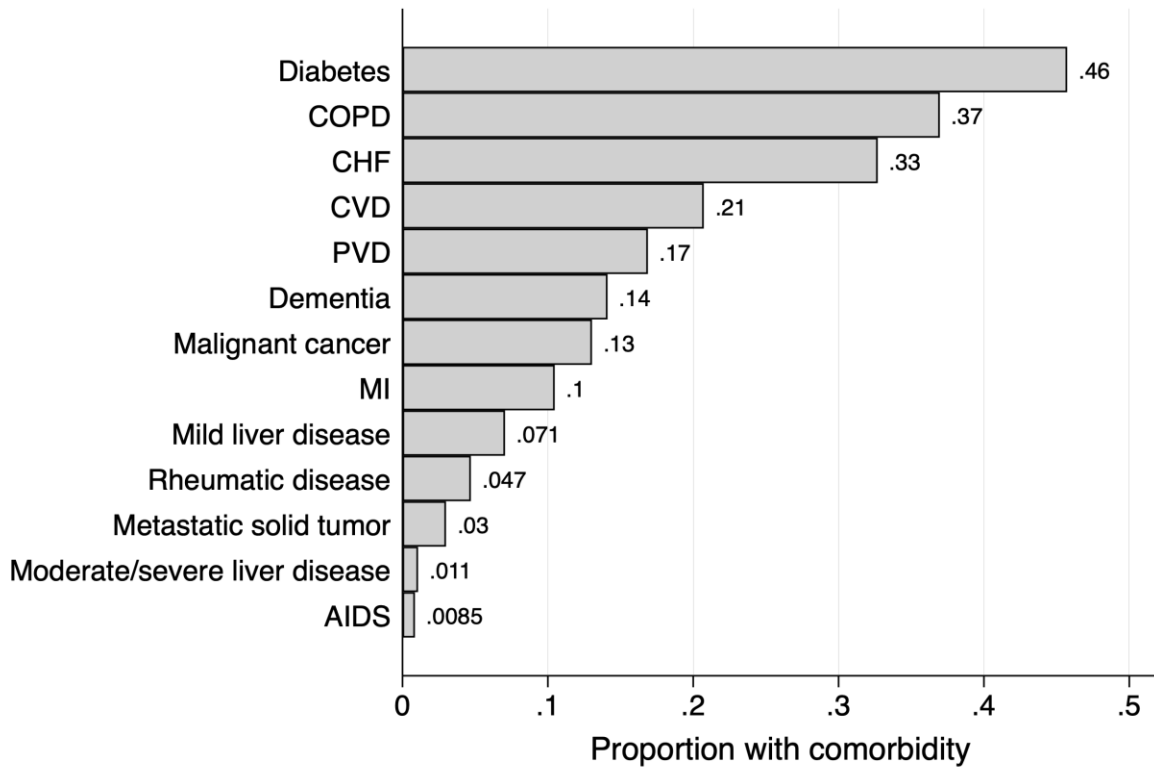

**eFigure 3. Mechanical ventilation over time**

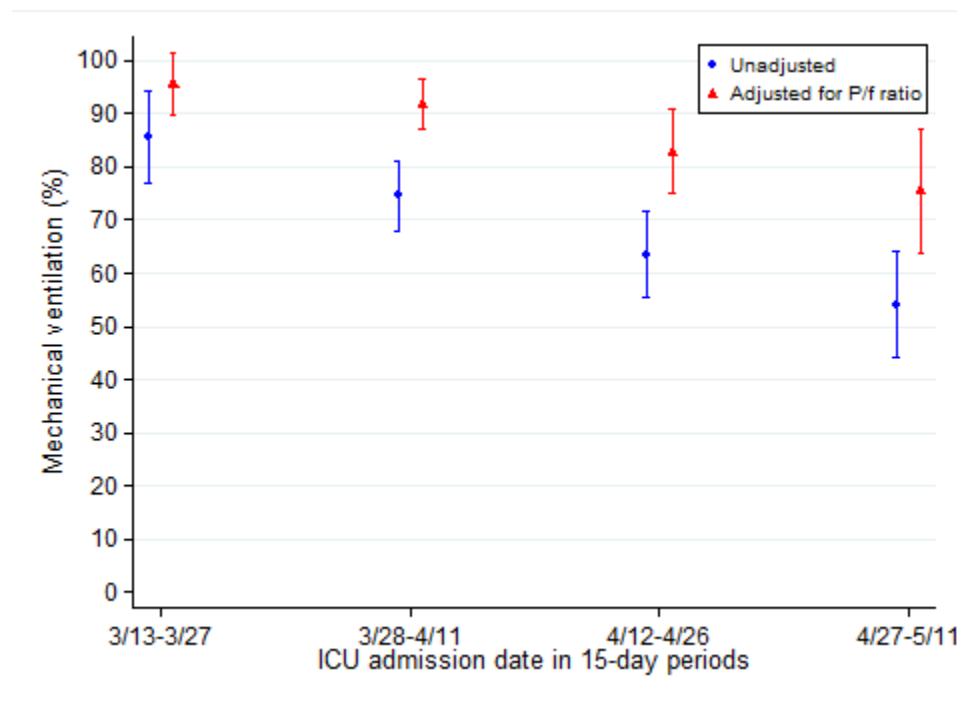

**eFigure 4. All-cause 28-day in-hospital mortality among patients requiring mechanical ventilation over time**

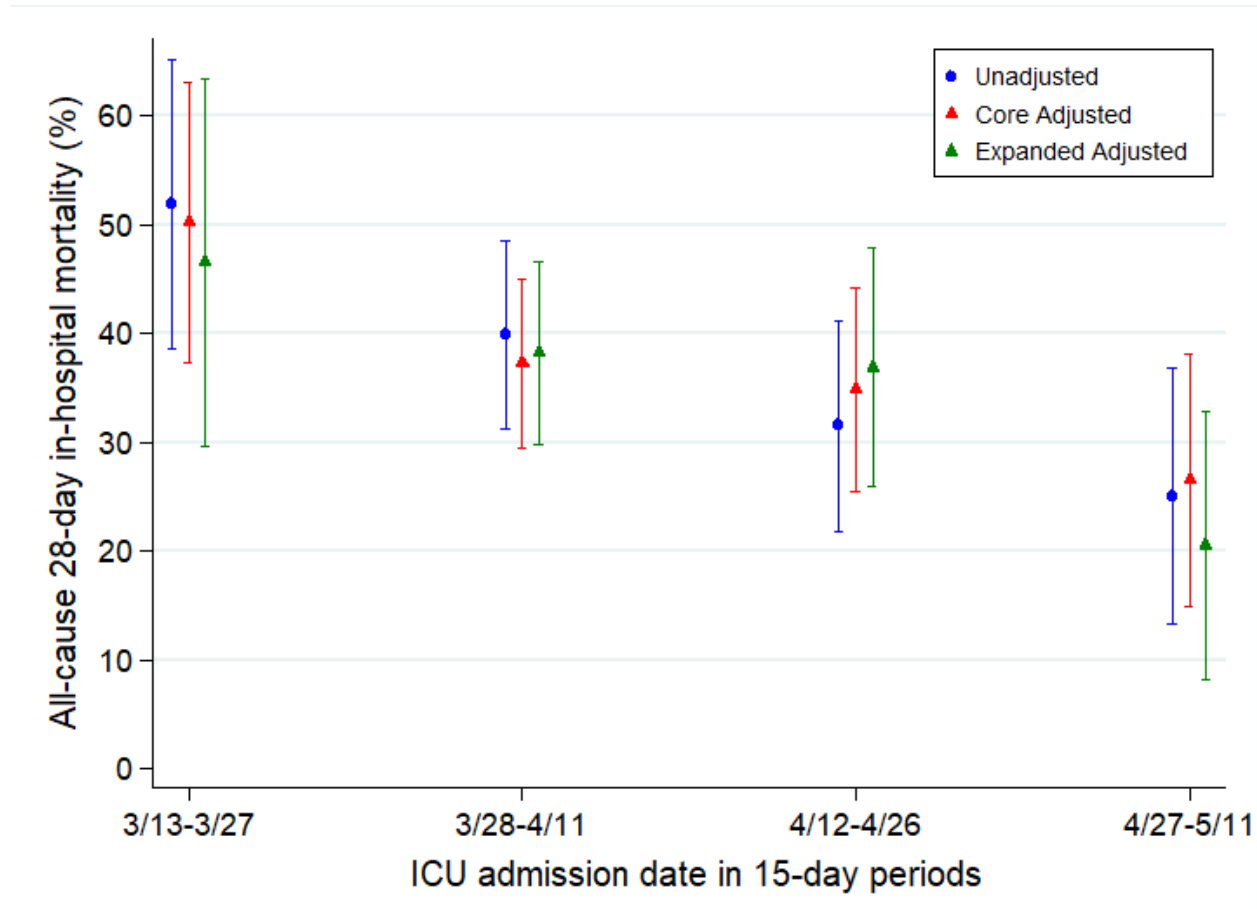



**eFigure 5. COVID-19 patient occupancy of pre-COVID-19 ICU and ward bed capacity**

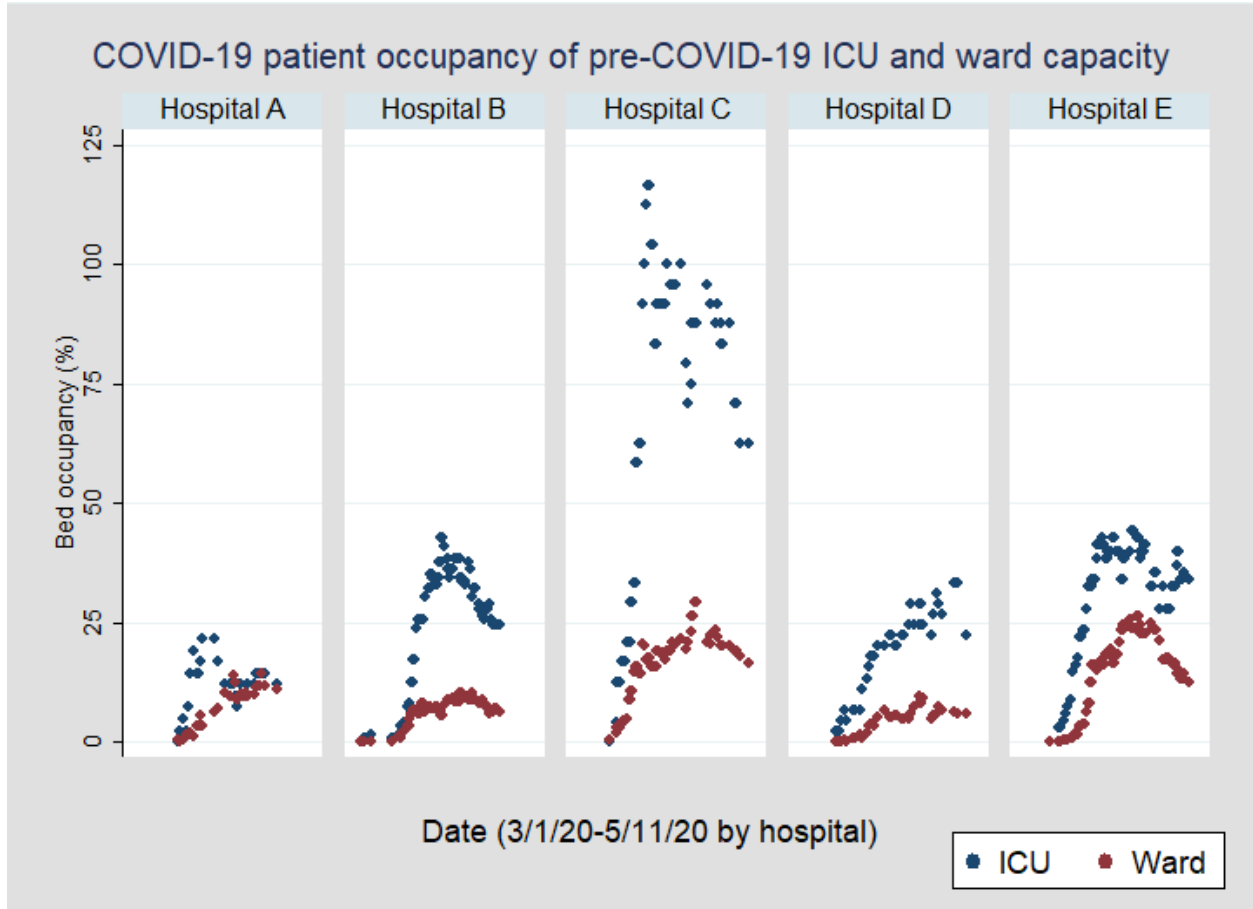

*Notes: Bed occupancy is calculated as a percentage of the pre-COVID bed capacity occupied by COVID-19 patients stratified by ICU vs ward and by hospital over time by calendar day.*

**eFigure 6. All-cause 28-day in-hospital mortality over time adjusted for COVID-19 patient occupancy of pre-COVID-19 ICU and ward bed capacity**

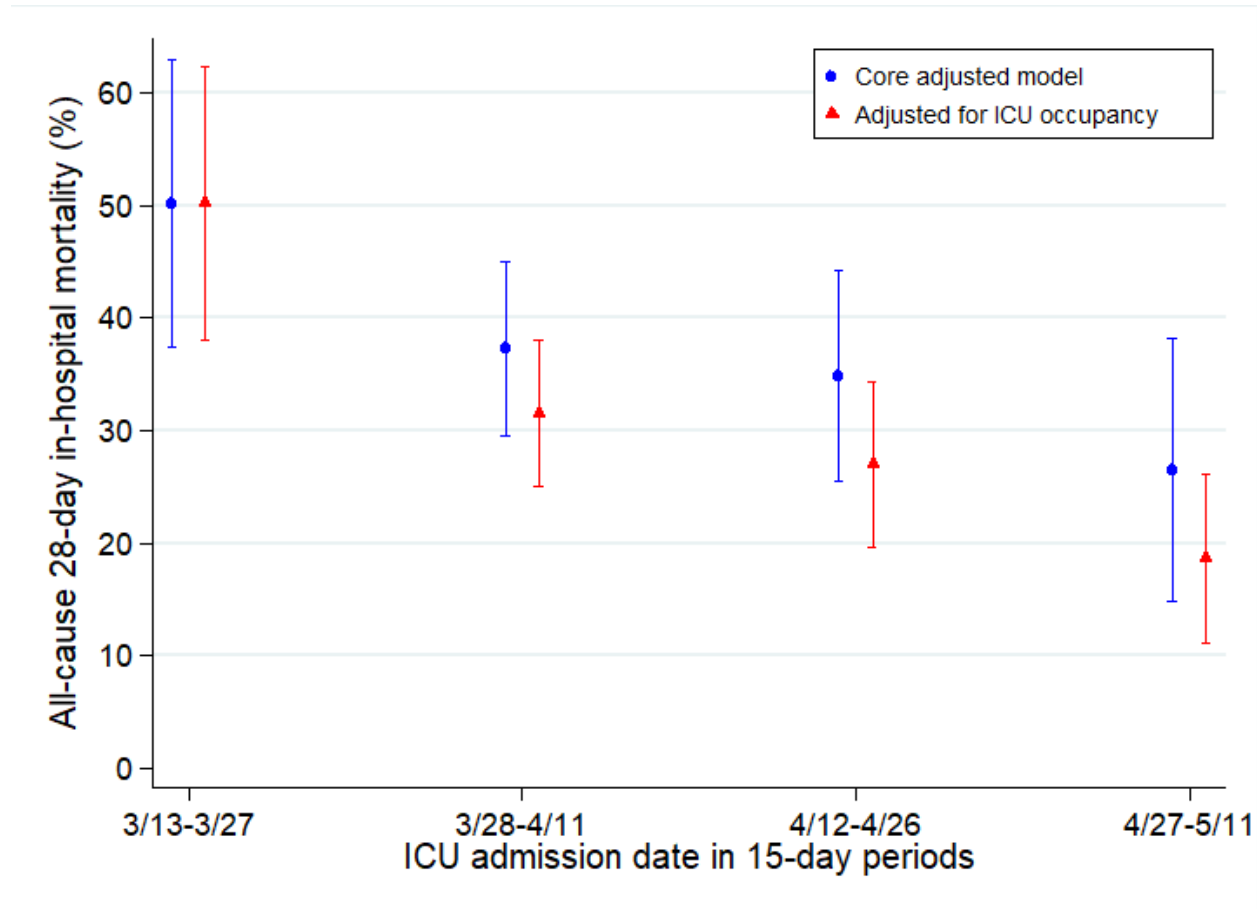

**eFigure 7. All-cause death at any time over time**

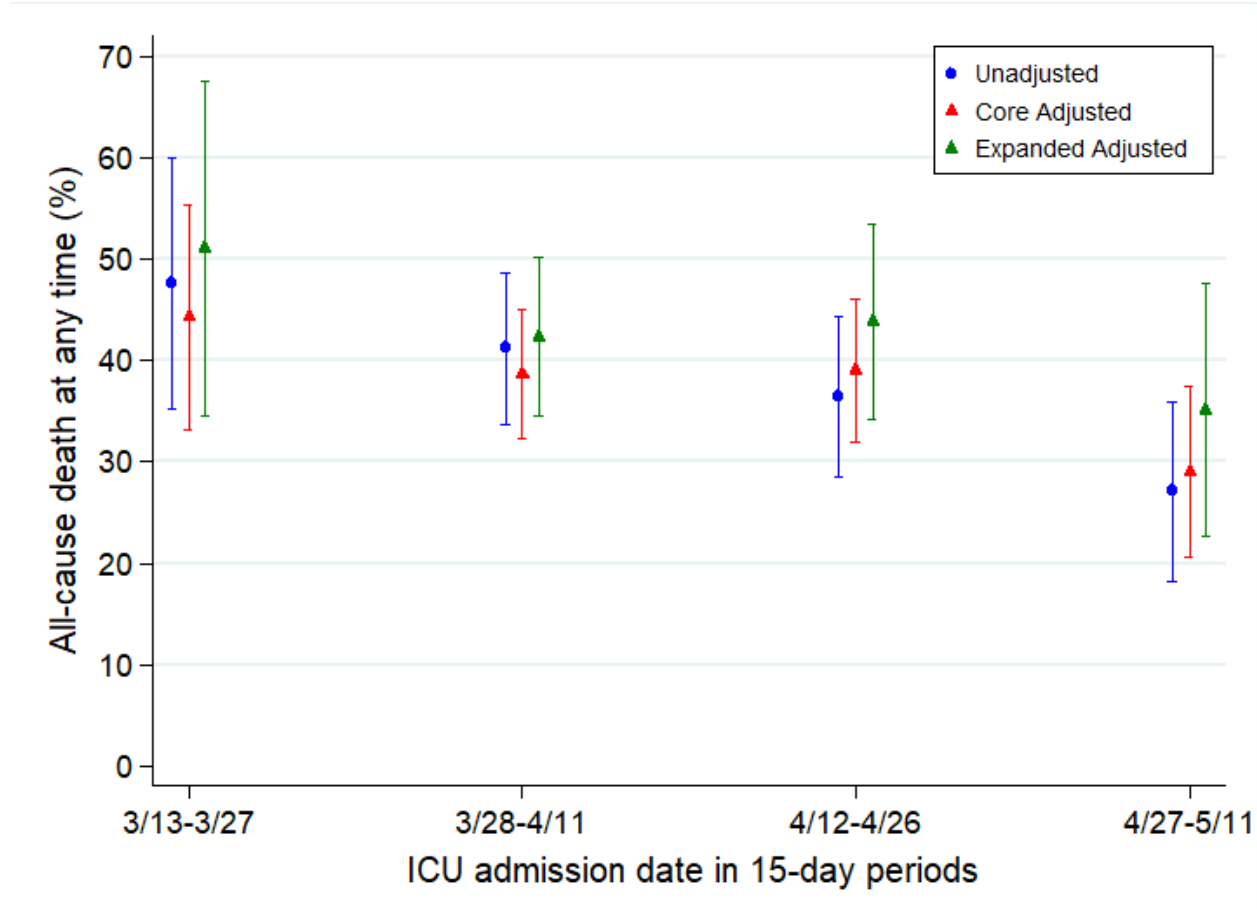

**eFigure 8. All-cause 28-day in-hospital mortality over cumulative COVID-19 patient volume**

All-cause 28-day in-hospital mortality decreased over cumulative COVID-19 patient volume in equal increments of 78 consecutive ICU admissions across the study period.

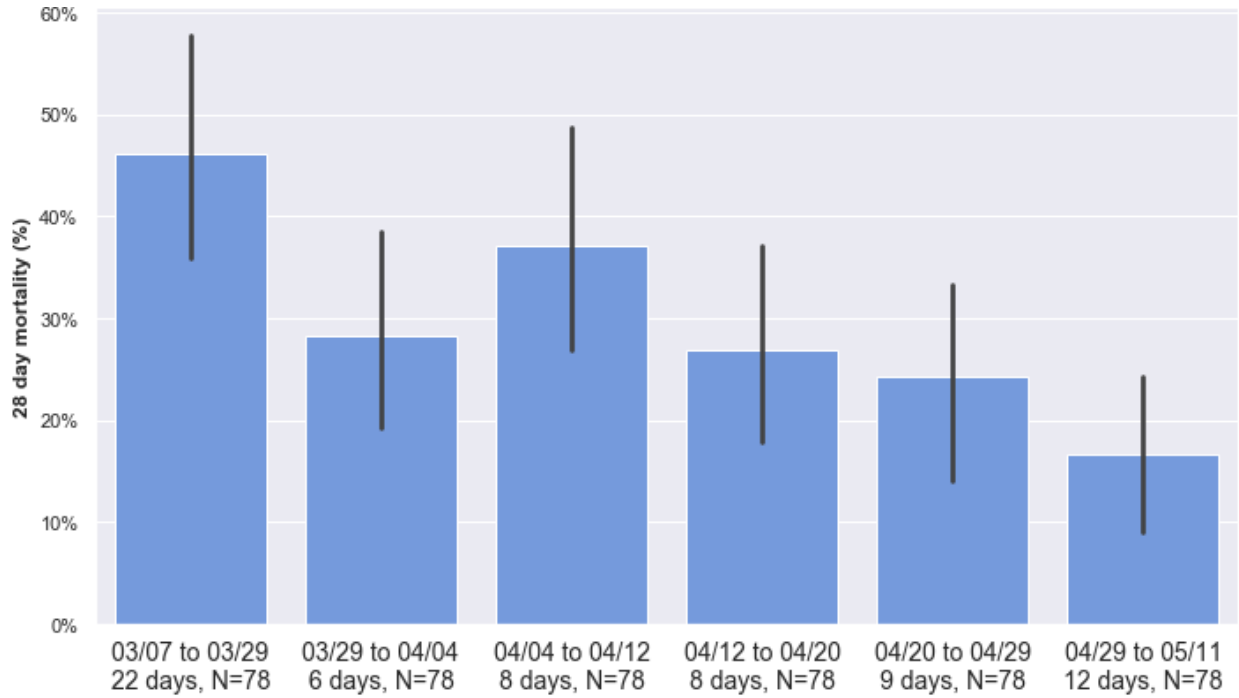

**eFigure 9. All-cause 28-day in-hospital mortality over time among patients less than or equal to 50 years of age**

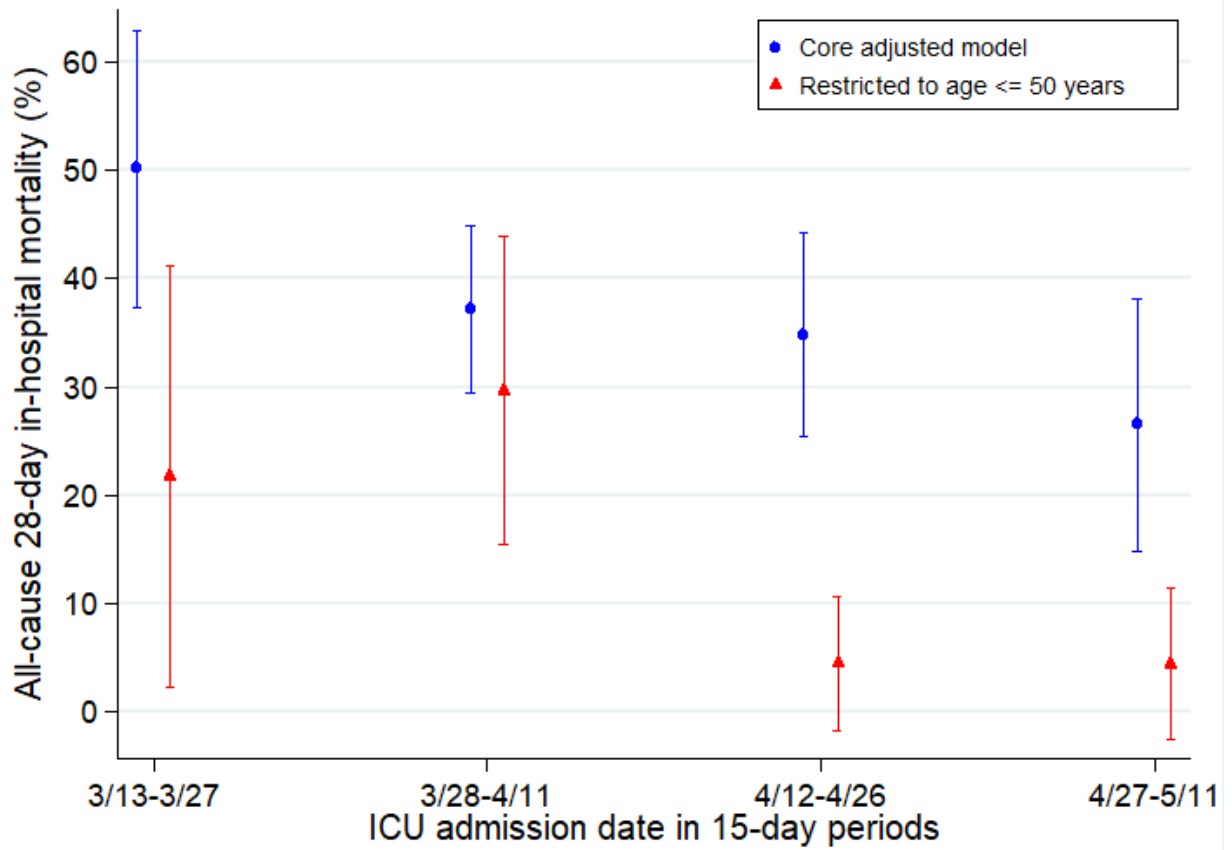

**eFigure 10. Age and in-hospital mortality**

Notes: Red subtotals report deaths by age category.

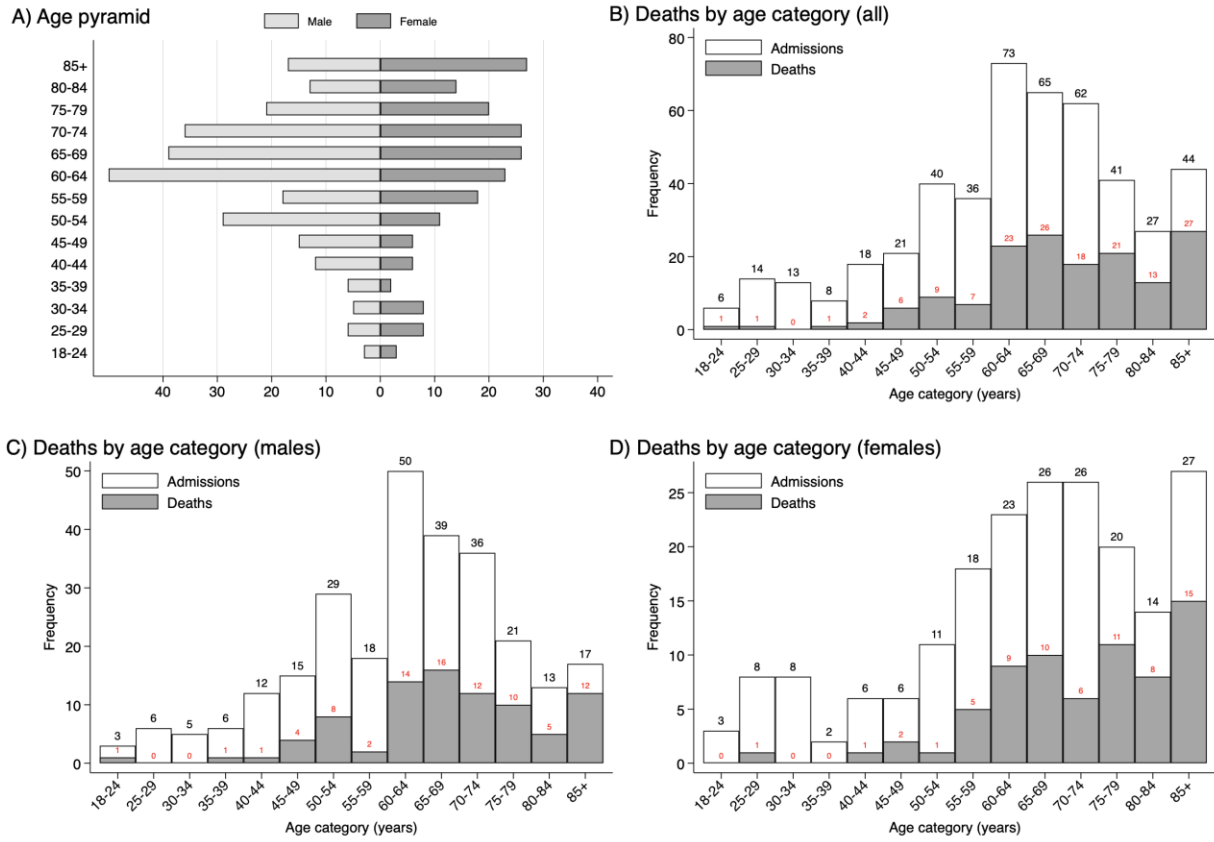

Supplement: aim-olf-M205327-M20-5327_Supplement.pdf [file aim-olf-M205327-M20-5327_Supplement.pdf]
